# Supplementary material for: Physiological action of bioherbicides in weed control: a systematic review
Source: Frontiers journal article supplement (doi:10.3389/fagro.2025.1633565), 2025-08-08
Supplement: Table_1.xlsx [file Table_1.xlsx]

## Sheet: Table S1
List of studies that were acquired with the stated keywords and after title and abstract screening in the review of bioherbicide physiological action.
Authors	Title	Year	DOI
Adetunji C.O., Oloke J.K., Phazang P., Sarin N.B.	Influence of eco-friendly phytotoxic metabolites from Lasiodiplodia pseudotheobromae C1136 on physiological, biochemical, and ultrastructural changes on tested weeds	2020	10.1007/s11356-020-07677-9
Adetunji, CO; Oloke, JK; Bello, OM; Pradeep, M; Jolly, RS	Isolation, structural elucidation and bioherbicidal activity of an eco-friendly bioactive 2-(hydroxymethyl) phenol, from Pseudomonas aeruginosa (C1501) and its ecotoxicological evaluation on soil	2019	10.1016/j.eti.2018.12.006
Ahmed, DA; Slima, DF	Effect of Aqueous Extract of Trianthema portulacastrum L. on the Growth of Zea mays L. and its Associated Weeds	2020	10.21608/ejbo.2019.12525.1310
Alipour, M; Saharkhiz, MJ; Niakousari, M; Damyeh, MS	Phytotoxicity of encapsulated essential oil of rosemary on germination and morphophysiological features of amaranth and radish seedlings	2019	10.1016/j.scienta.2018.08.023
Alvarez-Rodríguez, S; Spinozzi, E; Sánchez-Moreiras, AM; López-González, D; Ferrati, M; Lucchini, G; Maggi, F; Petrelli, R; Araniti, F	Investigating the phytotoxic potential of Carlina acaulis essential oil against the weed Bidens pilosa through a physiological and metabolomic approach	2023	10.1016/j.indcrop.2023.117149
Anwar, S; Naseem, S; Ali, Z	Biochemical analysis, photosynthetic gene (psbA) down-regulation, and in silico receptor prediction in weeds in response to exogenous application of phenolic acids and their analogs	2023	10.1371/journal.pone.0277146
Anwar, S; Naseem, S; Karimi, S; Asi, MR; Akrem, A; Ali, Z	Bioherbicidal Activity and Metabolic Profiling of Potent Allelopathic Plant Fractions Against Major Weeds of Wheat-Way Forward to Lower the Risk of Synthetic Herbicides	2021	10.3389/fpls.2021.632390
Araniti, F; Lupini, A; Mercati, F; Statti, GA; Abenavoli, MR	Calamintha nepeta L. (Savi) as source of phytotoxic compounds: bio-guided fractionation in identifying biological active molecules	2013	10.1007/s11738-013-1236-7
Araniti, F; Marrelli, M; Lupini, A; Mercati, F; Statti, GA; Abenavoli, MR	Phytotoxic activity of Cachrys pungens Jan, a mediterranean species: separation, identification and quantification of potential allelochemicals	2014	10.1007/s11738-013-1482-8
Asimakis, E; Shehata, AA; Eisenreich, W; Acheuk, F; Lasram, S; Basiouni, S; Emekci, M; Ntougias, S; Taner, G; May-Simera, H; Yilmaz, M; Tsiamis, G	Algae and Their Metabolites as Potential Bio-Pesticides	2022	10.3390/microorganisms10020307
Bailey K.L.	The Bioherbicide Approach to Weed Control Using Plant Pathogens	2014	10.1016/B978-0-12-398529-3.00014-2
Bailey, KL; Pitt, WM; Leggett, F; Sheedy, C; Derby, J	Determining the infection process of Phoma macrostoma that leads to bioherbicidal activity on broadleaved weeds	2011	10.1016/j.biocontrol.2011.06.019
Bajsa-Hirschel, J; Pan, ZQ; Pandey, P; Asolkar, RN; Chittiboyina, AG; Boddy, L; Machingura, MC; Duke, SO	Spliceostatin C, a component of a microbial bioherbicide, is a potent phytotoxin that inhibits the spliceosome	2023	10.3389/fpls.2022.1019938
Barickman, TC; Cantrell, CL; Reichley, A	A Water-Soluble β-Triketone Enriched Extract of Manuka Oil Has Increased Weed Control Efficacy Compared to Vinegar and D-Limonene in a Field and Greenhouse Evaluation	2024	10.1021/acsagscitech.4c00225
Batish, DR; Setia, N; Singh, HP; Kohli, RK	Phytotoxicity of lemon-scented eucalypt oil and its potential use as a bioherbicide	2004	10.1016/j.cropro.2004.05.009
Ben Ghnaya, A; Amri, I; Hanana, M; Gargouri, S; Jamoussi, B; Romane, A; Hamrouni, L	Tetraclinis articulata (Vahl.) Masters essential oil from Tunisia: Chemical characterization and herbicidal and antifungal activities assessment	2016	10.1016/j.indcrop.2015.12.026
Benchaa, S; Hazzit, M; Abdelkrim, H	Allelopathic Effect of Eucalyptus citriodora Essential Oil and Its Potential Use as Bioherbicide	2018	10.1002/cbdv.201800202
Bin Kueh, BW; Yusup, S; Osman, N; Ramli, NH	Analysis of Melaleuca cajuputi extract as the potential herbicides for paddy weeds	2019	10.1016/j.scp.2018.12.004
Bloch, I; Haviv, H; Rapoport, I; Cohen, E; Ben Shushan, RS; Dotan, N; Sher, I; Hacham, Y; Amir, R; Gal, M	Discovery and characterization of small molecule inhibitors of cystathionine gamma-synthase with in planta activity	2021	10.1111/pbi.13591
Bo, AB; Kim, JD; Kim, YS; Sin, HT; Kim, HJ; Khaitov, B; Ko, YK; Park, KW; Choi, JS	Isolation, identification and characterization of Streptomyces metabolites as a potential bioherbicide	2019	10.1371/journal.pone.0222933
Boukhalfa, R; Ruta, C; Messgo-Moumene, S; Calabrese, GJ; Argentieri, MP; De Mastro, G	Valorization of Mediterranean Species of Thyme for the Formulation of Bio-Herbicides	2024	10.3390/agronomy14092077
Bozhuyuk, AU	Herbicidal Activity and Chemical Composition of Two Essential Oils on Seed Germinations and Seedling Growths of Three Weed Species	2020	10.1080/0972060X.2020.1828178
Briere, SC; Watson, AK; Hallett, SG	Oxalic acid production and mycelial biomass yield of Sclerotinia minor for the formulation enhancement of a granular turf bioherbicide	2000	10.1080/09583150050044556
Brun, T; Rabuske, JE; Luft, L; Confortin, TC; Todero, I; Aita, BC; Zabot, GL; Mazutti, MA	Powder containing biomolecules from Diaporthe schini for weed control	2022	10.1080/09593330.2020.1867651
Cai, XY; Gu, MM	Bioherbicides in Organic Horticulture	2016	10.3390/horticulturae2020003
Chaimovitsh D., Shachter A., Abu-Abied M., Rubin B., Sadot E., Dudai N.	Herbicidal Activity of Monoterpenes Is Associated with Disruption of Microtubule Functionality and Membrane Integrity	2017	10.1614/WS-D-16-00044.1
Chandramohan S., Charudattan R.	Control of seven grasses with a mixture of three fungal pathogens with restricted host ranges	2001	10.1006/bcon.2001.0974
Chaves, JTL; Dias, GD; Pereira, MM; Bastos, LD; Souza, MIA; Vieira, LFA; de Paula, ACCFF; Marco, CA; Marchiori, PER; Bicalho, EM	New Perspective on the Use of α-Bisabolol for Weed Control	2024	10.1021/acs.jafc.3c08566
Chukwuma, OC; Tan, SP; Hughes, H; Mcloughlin, P; O'Toole, N; Mccarthy, N	The potential of seaweeds as a rich natural source for novel bioherbicide formulation/development	2024	10.1017/wsc.2024.1
Cordeau S., Triolet M., Wayman S., Steinberg C., Guillemin J.-P.	Bioherbicides: Dead in the water? A review of the existing products for integrated weed management	2016	10.1016/j.cropro.2016.04.016
Daniel, JJ; Zabot, GL; Tres, MV; Harakava, R; Kuhn, RC; Mazutti, MA	Fusarium fujikuroi: A novel source of metabolites with herbicidal activity	2018	10.1016/j.bcab.2018.04.001
Dawood, MG; El-Wakeel, MA; El-Awadi, ME; El-Rokiek, KG; El-Din, SAS	Evaluation of the bio-herbicidal potentiality of red radish on lupine plant and associated weeds	2022	10.21608/EJCHEM.2022.130161.5736
Dayan F.E., Duke S.O.	Natural Compounds as Next-Generation Herbicides	2014	10.1104/pp.114.239061
Dayan F.E., Howell J., Marais J.P., Ferreira D., Koivunen M.	Manuka oil, a natural herbicide with preemergence activity	2011	10.1614/WS-D-11-00043.1
Dayan, F. E., Owens, D. K., Watson, S. B., Asolkar, R. N., & Boddy, L. G.	Sarmentine, a natural herbicide from Piper species with multiple herbicide mechanisms of action	2015	10.3389/fpls.2015.00222
de Almeida T.C., Klaic R., Ariotti G., Sallet D., Spannemberg S.S., Schmaltz S., Foletto E.L., Kuhn R.C., Hoffmann R., Mazutti M.A.	Production and formulation of a bioherbicide as environment-friendly and safer alternative for weed control	2020	10.33263/BRIAC104.938943
Demasi, S; Caser, M; Fogliatto, S; Vidotto, F; Trotta, F; Scariot, V	Ailanthone inhibition data on seed germination and seedling growth of Lepidium sativum L. and Raphanus sativus L.	2019	10.1016/j.dib.2019.104550
Dharsini, PP; Dhanasekaran, D; Gopinath, PM; Ramanathan, K; Shanthi, V; Chandraleka, S; Biswas, B	Spectroscopic Identification and Molecular Modeling of Diethyl 7-hydroxytrideca-2, 5, 8, 11-tetraenedioate: a Herbicidal Compound from Streptomyces sp.	2017	10.1007/s13369-016-2401-2
Dolianitis, BM; Pfeifenberg, R; Frescura, VD; Tres, MV; Zabot, GL	Phytochemicals from Eucalyptus camaldulensis and Coleus barbatus Control Eragrostis plana in Horticulture	2025	10.3390/horticulturae11030291
Duke S.O., Owens D.K., Dayan F.E.	The growing need for biochemical bioherbicides	2014	10.1021/bk-2014-1172.ch003
Duke, SO	Why are there no widely successful microbial bioherbicides for weed management in crops?	2024	10.1002/ps.7595
El Mahdi, J; Tarraf, W; Ruta, C; Piscitelli, L; Aly, A; De Mastro, G	Bio-Herbicidal Potential of the Essential Oils from Different Rosmarinus officinalis L. Chemotypes in Laboratory Assays	2020	10.3390/agronomy10060775
El-Darier, SM; Abou-Zeid, HM; Marzouk, RI; Hatab, ASA	Biosynthesis of Silver Nanoparticles via Haplophyllum tuberculatum (Forssk.) A. Juss. (Rutaceae) and its Use as Bioherbicide	2020	10.21608/ejbo.2019.6827.1272
El-Gawad A.A., Elshamy A., El Gendy A.E.-N., Gaara A., Assaeed A.	Volatiles profiling, allelopathic activity, and antioxidant potentiality of Xanthium strumarium leaves essential oil from Egypt: Evidence from chemometrics analysis	2019	10.3390/molecules24030584
Frabboni, L; Tarantino, A; Petruzzi, F; Disciglio, G	Bio-Herbicidal Effects of Oregano and Rosemary Essential Oils on Chamomile (Matricaria chamomilla L.) Crop in Organic Farming System	2019	10.3390/agronomy9090475
Ganji, E; Andert, S	The effect of two-year application of pelargonic acid on the growth of Cirsium arvense (L.) Scop. and Sonchus arvensis L	2024	10.3389/fagro.2024.1330199
Ghimire, BK; Hwang, MH; Sacks, EJ; Yu, CY; Kim, SH; Chung, IM	Screening of Allelochemicals in Miscanthus sacchariflorus Extracts and Assessment of Their Effects on Germination and Seedling Growth of Common Weeds	2020	10.3390/plants9101313
Gomaa, NH; Hassan, MO; Fahmy, GM; González, L; Hammouda, O; Atteya, AM	Allelopathic effects of Sonchus oleraceus L. on the germination and seedling growth of crop and weed species	2014	10.1590/0102-33062014abb3433
González, JG; Flies, CN; Navarrete, AM; López, AG; Troncoso, CT	Bioherbicide from phenolic extract obtained from almazara waste	2019	10.17268/sci.agropecu.2019.04.06
Grul'ová, D; Caputo, L; Elshafie, HS; Baranová, B; De Martino, L; Sedlák, V; Gogal'ová, Z; Porácová, J; Camele, I; De Feo, V	Thymol Chemotype Origanum vulgare L. Essential Oil as a Potential Selective Bio-Based Herbicide on Monocot Plant Species	2020	10.3390/molecules25030595
Guo Y., Liu W., Wang H., Wang X., Qiang S., Kalaji H.M., Strasser R.J., Chen S.	Action Mode of the Mycotoxin Patulin as a Novel Natural Photosystem II Inhibitor	2021	10.1021/acs.jafc.1c01811
Harding, DP; Raizada, MN	Controlling weeds with fungi, bacteria and viruses: a review	2015	10.3389/fpls.2015.00659
Hasan, M; Ahmad-Hamdani, MS; Rosli, AM; Hamdan, H	Bioherbicides: An Eco-Friendly Tool for Sustainable Weed Management	2021	10.3390/plants10061212
Hasan, M; Mokhtar, AS; Mahmud, K; Berahim, Z; Rosli, AM; Hamdan, H; Motmainna, M; Ahmad-Hamdani, MS	Physiological and biochemical responses of selected weed and crop species to the plant-based bioherbicide WeedLock	2022	10.1038/s41598-022-24144-2
Hashemzadeh, F; Derakhshandeh, SH; Soori, MM; Khedri, F; Rajabi, S	Bisphenol A adsorption using modified aloe vera leaf-wastes derived bio-sorbents from aqueous solution: kinetic, isotherm, and thermodynamic studies	2024	10.1080/09603123.2023.2208536
Hendges, APPK; Teixeira, SD; De Lima, VA; Trezzi, MM; Moreira, BGM; Cavalcante, KM; Maia, BHLNS	Phytotoxic bioassays and Fingerprinting by HPLC-DAD of Eragrostis plana Nees Root Extracts - application of chemometrics	2021	10.1590/0001-3765202120200129
Héraux, FMG; Hallett, SG; Ragothama, KG; Weller, SC	Composted chicken manure as a medium for the production and delivery of Trichoderma virens for weed control	2005	10.21273/HORTSCI.40.5.1394
Hoagland, RE; Boyette, CD	Effects of the Fungal Bioherbicide, Alternaria cassia on Peroxidase, Pectinolytic and Proteolytic Activities in Sicklepod Seedlings	2021	10.3390/jof7121032
Hoagland, RE; Boyette, CD; Weaver, MA; Abbas, HK	Bioherbicides: Research and risks	2007	10.1080/15569540701603991
Hoagland, RE; Weaver, MA; Boyette, CD	Enzyme-Linked Immunosorbent Assay Detection of Trichothecenes Produced by the Bioherbicide Myrothecium verrucaria in Cell Cultures, Extracts, and Plant Tissues	2008	10.1080/00103620802432923
Hopson, CA; Natarajan, P; Shinde, S; Kshetry, AO; Challa, KR; Valenciana, AP; Nimmakayala, P; Reddy, UK	Physiological and Transcriptomic Analysis of Arabidopsis thaliana Responses to Ailanthone, a Potential Bio-Herbicide	2022	10.3390/ijms231911854
Hubbard, M; Hynes, RK; Bailey, KL	Impact of macrocidins, produced by Phoma macrostoma, on carotenoid profiles of plants	2015	10.1016/j.biocontrol.2015.04.017
Ilboudo, TCS; Yonli, D; Sourabie, S; Zerbo, P; Traoré, H; Boussim, JI	Aqueous extracts from indigenous plant in Burkina Faso with bio-herbicide properties to reduce Striga hermonthica (Del.) Benth propagation	2022	10.1186/s43170-022-00129-z
Islam, MS; Iwasaki, A; Suenaga, K; Kato-Noguchi, H	Evaluation of phytotoxic potential and identification of phytotoxic compounds in Rumex maritimus	2018	10.1080/11263504.2017.1338630
Islam, MS; Iwasaki, A; Suenaga, K; Kato-Noguchi, H	2-Methoxystypandrone, a potent phytotoxic substance in &ITRumex maritimus &ITL.	2017	10.1007/s40626-017-0095-9
Jahromi, FG; Ash, GJ; Cother, EJ	Influence of cultural and environmental conditions on conidial production, conidial germination and infectivity of Rhynchosporium alismatis, a candidate mycoherbicide	1998	10.1071/AP98020
Jiang S.-J., Qiang S., Zhu Y.-Z., Dong Y.-F.	Isolation and phytotoxicity of a metabolite from Curvularia eragrostidis and characterisation of its modes of action	2008	10.1111/j.1744-7348.2007.00202.x
Jiang, GD; Zuo, R; Zhang, Y; Powell, MM; Zhang, PL; Hylton, SM; Loria, R; Ding, YS	One-Pot Biocombinatorial Synthesis of Herbicidal Thaxtomins	2018	10.1021/acscatal.8b03317
Kaab, SB; Rebey, IB; Hanafi, M; Hammi, KM; Smaoui, A; Fauconnier, ML; De Clerck, C; Jijakli, MH; Ksouri, R	Screening of Tunisian plant extracts for herbicidal activity and formulation of a bioherbicide based on Cynara cardunculus	2020	10.1016/j.sajb.2019.10.018
Kamel, EM; Eid, SDM; Elian, HMA	Allelochemicals Effect of Aqueous Sweet Basil (Ocimum basilicum L.) on Weed Control in Peanut and Cowpea Crops	2022	10.21608/EJCHEM.2021.93101.4455
Kang, SM; Bilal, S; Shahzad, R; Kim, YN; Park, CW; Lee, KE; Lee, JR; Lee, IJ	Effect of Ammonia and Indole-3-acetic Acid Producing Endophytic Klebsiella pneumoniae YNA12 as a Bio-Herbicide forWeed Inhibition: Special Reference with Evening Primroses	2020	10.3390/plants9060761
Kaur, S; Singh, HP; Batish, DR; Kohli, RK	Chemical characterization and allelopathic potential of volatile oil of Eucalyptus tereticornis against Amaranthus viridis	2011	10.1080/17429145.2010.539709
Khang, D; Quy, TN; Dam, NP; Tuan, NT; Men, TT; Van Ay, N; Thuy, NP	Isolation and purification of potential weed inhibitors from Mimosa pigra L.	2023	10.1016/j.heliyon.2023.e18205
Kordali, S; Kabaagac, G; Sen, I; Yilmaz, F; Najda, A	Phytotoxic Effects of Three Origanum Species Extracts and Essential Oil on Seed Germinations and Seedling Growths of Four Weed Species	2022	10.3390/agronomy12102581
Ladhari, A; Omezzine, F; DellaGreca, M; Zarrelli, A; Zuppolini, S; Haouala, R	Phytotoxic activity of Cleome arabica L. and its principal discovered active compounds	2013	10.1016/j.sajb.2013.08.016
Lee, SM; Radhakrishnan, R; Kang, SM; Kim, JH; Lee, IY; Moon, BK; Yoon, BW; Lee, IJ	Phytotoxic mechanisms of bur cucumber seed extracts on lettuce with special reference to analysis of chloroplast proteins, phytohormones, and nutritional elements	2015	10.1016/j.ecoenv.2015.07.015
Li, JX; Chen, H; Guo, CW; Chen, QH; Zhao, TT; Chen, XN; Du, YL; Du, HZ; Miao, YH; Liu, DH	Artemisia argyi essential oil exerts herbicidal activity by inhibiting photosynthesis and causing oxidative damage	2023	10.1016/j.indcrop.2023.116258
López-González, D; Usero, MM; Hermida-Ramón, JM; Alvarez-Rodríguez, S; Araniti, F; Teijeira, M; Verdeguer, M; Sánchez-Moreiras, AM	Pelargonic acid's interaction with the auxin transporter PIN1: A potential mechanism behind its phytotoxic effects on plant metabolism	2024	10.1016/j.plantsci.2024.112278
Lorenzo, P; Reboredo-Durán, J; Múñoz, L; González, L; Freitas, H; Rodríguez-Echeverría, S	Inconsistency in the detection of phytotoxic effects: A test with Acacia dealbata extracts using two different methods	2016	10.1016/j.phytol.2015.11.001
Ma, YH; Shah, M; Shi, K; Chen, HY; Golkar, P; Abbasi, AM; Shao, H	Chemical Composition and Phytotoxic Activity of Mentha vagans Boriss. Essential Oil	2024	10.1002/cbdv.202401367
Maccioni, A; Santo, A; Falconieri, D; Piras, A; Farris, E; Maxia, A; Bacchetta, G	Phytotoxic effects of Salvia rosmarinus essential oil on Acacia saligna seedling growth	2020	10.1016/j.flora.2020.151639
Macías F.A., Chinchilla N., Varela R.M., Molinillo J.M.G.	Bioactive steroids from Oryza sativa L.	2006	10.1016/j.steroids.2006.03.001
Macías-Rubalcava, ML; Garrido-Santos, MY	Phytotoxic compounds from endophytic fungi	2022	10.1007/s00253-022-11773-w
Madadi, E; Fallah, S; Sadeghpour, A; Barani-Beiranvand, H	Exploring the use of chamomile (Matricaria chamomilla L.) bioactive compounds to control flixweed (Descurainia sophia L.) in bread wheat (Triticum aestivum L.): Implication for reducing chemical herbicide pollution	2022	10.1016/j.sjbs.2022.103421
Mahanta, BP; Kemprai, P; Bora, PK; Lal, M; Haldar, S	Phytotoxic essential oil from black turmeric (Curcuma caesia Roxb.) rhizome: Screening, efficacy, chemical basis, uptake and mode of transport	2022	10.1016/j.indcrop.2022.114788
Marques, MEM; de Carvalho, AC; Yendo, ACA; Magedans, YVS; Zachert, E; Fett-Neto, AG	Phytotoxicity of Quillaja lancifolia Leaf Saponins and Their Bioherbicide Potential	2023	10.3390/plants12030663
Marrone, PG	Status of the biopesticide market and prospects for new bioherbicides	2024	10.1002/ps.7403
Marsico, G; Ciccone, MS; Masi, M; Freda, F; Cristofaro, M; Evidente, A; Superchi, S; Scafato, P	Synthesis and Herbicidal Activity Against Buffelgrass (Cenchrus ciliaris) of (±)-3-deoxyradicinin	2019	10.3390/molecules24173193
Masi, M; Freda, F; Sangermano, F; Calabrò, V; Cimmino, A; Cristofaro, M; Meyer, S; Evidente, A	Radicinin, a Fungal Phytotoxin as a Target-Specific Bioherbicide for Invasive Buffelgrass (Cenchrus ciliaris) Control	2019	10.3390/molecules24061086
Mathur M., Gehlot P.	Recruit the plant pathogen for weed management: Bioherbicide a sustainable strategy	2018	10.1007/978-981-13-0393-7_10
Mendes I.D.S., Rezende M.O.O.	Assessment of the allelopathic effect of leaf and seed extracts of Canavalia ensiformis as postemergent bioherbicides: A green alternative for sustainable agriculture	2014	10.1080/03601234.2014.882179
Merkle, M; Gerhards, R	Discovering Novel Bioherbicides: The Impact of Hemp-derived Phytocannabinoid Applications on Zea mays L. and Relevant Weeds	2024	10.1007/s10343-024-01011-w
Mitchell, JK	Development of a submerged-liquid sporulation medium for the potential smartweed bioherbicide Septoria polygonorum	2003	10.1016/S1049-9644(03)00024-0
Moeini, A; Masi, M; Zonno, MC; Boari, A; Cimmino, A; Tarallo, O; Vurro, M; Evidente, A	Encapsulation of inuloxin A, a plant germacrane sesquiterpene with potential herbicidal activity, in β-cyclodextrins	2019	10.1039/c8ob03156h
Mortensen, K; Makowski, RMD	Effects of Colletotrichum gloeosporioides f. sp. malvae on plant development and biomass of non-target field crops under controlled and field conditions	1997	10.1046/j.1365-3180.1997.d01-57.x
Motmainna, M; Juraimi, ASB; Uddin, MK; Asib, NB; Islam, AKMM; Hasan, M	Assessment of allelopathic compounds to develop new natural herbicides: A review	2021	10.26651/allelo.j/2021-51-1-1305
Moura, MS; Lacerda, JWF; Siqueira, KA; Bellete, BS; Sousa, PT; Dall'Oglio, EL; Soares, MA; Vieira, LCC; Sampaio, OM	Endophytic fungal extracts: evaluation as photosynthesis and weed growth inhibitors	2020	10.1080/03601234.2020.1721981
Mutlu, S; Atici, Ö; Esim, N; Mete, E	Essential oils of catmint (Nepeta meyeri Benth.) induce oxidative stress in early seedlings of various weed species	2011	10.1007/s11738-010-0626-3
Ni, XZ; Bai, HD; Han, JC; Zhou, Y; Bai, ZD; Luo, SQ; Xu, JJ; Jin, CZ; Li, ZR	Inhibitory activities of essential oils from Syzygium aromaticum inhibition of Echinochloa crus-galli	2024	10.1371/journal.pone.0304863
Nikolova, M; Yankova-Tsvetkova, E; Stefanova, T; Berkov, S	EXUDATE FLAVONOIDS OF Primula veris LEAVES AND THEIR INHIBITORY ACTIVITY ON Lolium perrene SEED GERMINATION	2023	10.7546/CRABS.2023.03.07
O’Sullivan J., Van Acker R., Grohs R., Riddle R.	Improved herbicide efficacy for organically grown vegetables	2015	10.1007/s13165-015-0107-5
Okunowo, WO; Osuntoki, AA; Adekunle, AA; Gbenle, GO; Abbas, HK; Shier, WT	Optimization of Myrothecium roridum tode: fries phytotoxin production and bioactivity on water hyacinth (Eichhornia crassipes)	2021	10.1080/15569543.2018.1564772
Pannacci, E; Masi, M; Farneselli, M; Tei, F	Evaluation of Mugwort (Artemisia vulgaris L.) Aqueous Extract as a Potential Bioherbicide to Control Amaranthus retroflexus L. in Maize	2020	10.3390/agriculture10120642
Pardo-Muras M., Puig C.G., Pedrol N.	Cytisus scoparius and Ulex europaeus produce volatile organic compounds with powerful synergistic herbicidal effects	2019	10.3390/molecules24244539
Pardo-Muras, M; Puig, CG; López-Nogueira, A; Cavaleiro, C; Pedrol, N	On the bioherbicide potential of Ulex europaeus and Cytisus scoparius: Profiles of volatile organic compounds and their phytotoxic effects	2018	10.1371/journal.pone.0205997
Pati, UK; Chowdhury, A	Study Of Parthenium hysterophorus L. Extracts (First clean-up Fractions) On Seed Germination Behaviour In Search Of Bioactive Fractions for Preparation of Bioherbicide Formulations	2015	10.18052/www.scipress.com/ILNS.49.69
Pérez-Izquierdo, C; Bueso, MJJ; Rodríguez-Molina, MD; Pulido, F	Spatial Variation in Yield, Chemical Composition, and Phytotoxic Activity of Cistus ladanifer Essential Oils	2023	10.1002/cbdv.202300995
Pernak, J; Czerniak, K; Niemczak, M; Lawniczak, L; Kaczmarek, DK; Borkowski, A; Praczyk, T	Bioherbicidal Ionic Liquids	2018	10.1021/acssuschemeng.7b04382
Pernak, J; Legosz, B; Klejdysz, T; Marcinkowska, K; Rogowski, J; Kurasiak-Popowska, D; Stuper-Szablewska, K	Ammonium bio-ionic liquids based on camelina oil as potential novel agrochemicals	2018	10.1039/c8ra03519a
Pouresmaeil, M; Nojadeh, MS; Movafeghi, A; Maggi, F	Exploring the bio-control efficacy of Artemisia fragrans essential oil on the perennial weed Convolvulus arvensis: Inhibitory effects on the photosynthetic machinery and induction of oxidative stress	2020	10.1016/j.indcrop.2020.112785
Pouresmaeil, M; Sabzi-Nojadeh, M; Movafeghi, A; Aghbash, BN; Kosari-Nasab, M; Zengin, G; Maggi, F	Phytotoxic activity of Moldavian dragonhead (Dracocephalum moldavica L.) essential oil and its possible use as bio-herbicide	2022	10.1016/j.procbio.2022.01.018
Puig C.G., Reigosa M.J., Valentão P., Andrade P.B., Pedrol N.	Unravelling the bioherbicide potential of Eucalyptus globulus Labill: Biochemistry and effects of its aqueous extract	2018	10.1371/journal.pone.0192872
Pytlarz, E; Gala-Czekaj, D	Seed Meals from Allelopathic Crops as a Potential Bio-Based Herbicide on Herbicide-Susceptible and -Resistant Biotypes of Wild Oat (Avena fatua L.)	2022	10.3390/agronomy12123083
Radhakrishnan R., Alqarawi A.A., Abd Allah E.F.	Bioherbicides: Current knowledge on weed control mechanism	2018	10.1016/j.ecoenv.2018.04.018
Radhakrishnan, R; Park, JM; Lee, IJ	Enterobacter sp I-3, a bio-herbicide inhibits gibberellins biosynthetic pathway and regulates abscisic acid and amino acids synthesis to control plant growth	2016	10.1016/j.micres.2016.10.004
Razavi, SM; Zarrini, G; Rad, FG	Isoarnottinin 4'-glucoside, a glycosylated coumarin from Prangos uloptera, with biological activity	2011	10.1134/S1068162011020130
Rob, MM; Hossen, K; Ozaki, K; Teruya, T; Kato-Noguchi, H	Phytotoxicity and Phytotoxic Substances in Calamus tenuis Roxb.	2023	10.3390/toxins15100595
Rob, MM; Iwasaki, A; Suzuki, R; Suenaga, K; Kato-Noguchi, H	Garcienone, a Novel Compound Involved in Allelopathic Activity of Garcinia Xanthochymus Hook	2019	10.3390/plants8090301
Rosa, D; Brás, T; Rial, C; Varela, RM; Maças, B; Macías, FA; Duarte, MF	Sesquiterpene lactones enriched-fractions obtained from Cynara cardunculus extract diaultrafiltration	2024	10.1016/j.indcrop.2024.118926
Rosskopf, E	Bioherbicide research: Defining success (A tribute to Raghavan Charudattan)	2007	10.1080/14620316.2007.11512289
Sadeqifard, S; Mirmostafaee, S; Joharchi, MR; Zandavifard, J; Azizi, M; Fujii, Y	Evaluation of Allelopathic Activity Interactions of Some Medicinal Plants Using Fractional Inhibitory Concentration and Isobologram	2022	10.3390/agronomy12123001
Safdar, ME; Tanveer, A; Khaliq, A; Naeem, MS; Ahmad, S	Tree species as a potential source of bio-herbicides for controlling Parthenium hysterophorus L.	2013	10.1080/14786419.2013.790028
Saludes-Zanfan, MI; González-Hernández, AI; Vivar-Quintana, AM; Morales-Corts, MR	Phytotoxicity of phenolic compounds of Pistacia vera leaves and its potential use as bioherbicide	2024	10.1016/j.cropro.2024.106812
Scavo, A; Mejías, FJR; Chinchilla, N; Molinillo, JMG; Schwaiger, S; Lombardo, S; Macías, FA; Mauromicale, G	Wheat Response and Weed-Suppressive Ability in the Field Application of a Nanoencapsulated Disulfide (DiS-NH2) Bioherbicide Mimic	2023	10.3390/agronomy13041132
Scavo, A; Pandino, G; Restuccia, A; Mauromicale, G	Leaf extracts of cultivated cardoon as potential bioherbicide	2020	10.1016/j.scienta.2019.109024
Schein, D; Santos, MSN; Schmaltz, S; Nicola, LEP; Bianchin, CF; Ninaus, RG; de Menezes, BB; dos Santos, RC; Zabot, GL; Tres, MV; Mazutti, MA	Microbial Prospection for Bioherbicide Production and Evaluation of Methodologies for Maximizing Phytotoxic Activity	2022	10.3390/pr10102001
secondary metabolites	Quinoline derivatives producing Pseudomonas aeruginosa H6 as an efficient bioherbicide for weed management	2019	10.1016/j.bcab.2019.101096
Shao, H; Hu, YX; Han, CX; Wei, CX; Zhou, SX; Zhang, CP; Zhang, C	Chemical Composition and Phytotoxic Activity of Seriphidium terrae-albae (Krasch.) Poljakov (Compositae) Essential Oil	2018	10.1002/cbdv.201800348
Shrestha, A	Potential of a Black Walnut (Juglans nigra) Extract Product (NatureCur®) as a Pre- and Post-Emergence Bioherbicide	2009	10.1080/10440040903303397
Silva, ER; Igartuburu, JM; Overbeck, GE; Soares, GLG; Macías, FA	Bioherbicide Potential ofEucalyptus salignaLeaf Litter Essential Oil	2020	10.1002/cbdv.202000407
Simonet, AM; Durán, AG; Macías, FA	Dereplication of Bioactive Agave Saponin Fractions: The Hidden Saponins	2024	10.1021/acs.jafc.4c02308
Sindhu S.S., Khandelwal A., Phour M., Sehrawat A.	Bioherbicidal potential of rhizosphere microorganisms for ecofriendly weed management	2018	10.1007/978-981-10-8402-7_13
Singh, HP; Batish, DR; Setia, N; Kohli, RK	Herbicidal activity of volatile oils from Eucalyptus citriodora against Parthenium hysterophorus	2005	10.1111/j.1744-7348.2005.04018.x
Spiassi, A; Fortes, AMT; Guedes, LPC; de Lima, GP; Meira, RO; Valmorbida, R; de Mendonça, LC	PHYTOCHEMICAL SCREENING AND TOXICITY OF Crambe abyssinica Hochst EXTRACTS ON Solanum lycopersicum L., Euphorbia heterophylla L., Bidens pilosa L. AND Glycine max (L.) Merril	2019	10.14393/BJ-v35n5a2019-42328
Synowiec, A; Mozdzen, K; Krajewska, A; Landi, M; Araniti, F	Carum carvi L. essential oil: A promising candidate for botanical herbicide against Echinochloa crus-galli (L.) P. Beauv. in maize cultivation	2019	10.1016/j.indcrop.2019.111652
Thang, PT; Vien, NV; Anh, L; Xuan, TD; Duong, VX; Nhung, NT; Trung, KH; Quan, NT; Nguyen, CC; Loan, LK; Khanh, TD; Ha, TTT	Assessment of Allelopathic Activity of Arachis pintoi Krapov. & WC Greg as a Potential Source of Natural Herbicide for Paddy Rice	2023	10.3390/app13148268
Tong, Y; Liu, SY; Yi, SC; Qiu, ZX; Wang, YH; Zeng, DQ; Tang, WW	Bruceine D, the main active ingredient of Brucea javanica (L.) residue inhibits the germination of Bidens pilosa L. seeds by suppressing phenylpropanoid biosynthesis	2021	10.1016/j.indcrop.2021.114079
Travaini M.L., Sosa G.M., Ceccarelli E.A., Walter H., Cantrell C.L., Carrillo N.J., Dayan F.E., Meepagala K.M., Duke S.O.	Khellin and Visnagin, Furanochromones from Ammi visnaga (L.) Lam., as Potential Bioherbicides	2016	10.1021/acs.jafc.6b02462
Umurzokov, M; Lee, YM; Kim, HJ; Cho, KM; Kim, YS; Choi, JS; Park, KW	Herbicidal characteristics and structural identification of a potential active compound produced by Streptomyces sp. KRA18-249 br	2022	10.1016/j.pestbp.2022.105213
Vurro, M	Are root parasitic broomrapes still a good target for bioherbicide control?	2024	10.1002/ps.7360
Wang, X; Gu, MM; Niu, GH; Baumann, PA	Herbicidal activity of mustard seed meal (Sinapis alba 'IdaGold' and Brassica juncea 'Pacific Gold') on weed emergence	2015	10.1016/j.indcrop.2015.09.070
Wang, X; Niu, GH; Gu, MM; Baumann, PA; Masabni, J	Response of Vegetable Seedling Emergence to Mustard (Sinapis alba 'IdaGold' and Brassica juncea 'Pacific Gold') Seed Meal	2017	10.21273/HORTSCI11388-16
Wannes, WA; Dakhlaoui, S; Limam, H; Tammar, S; Msaada, K	Chemical profile, allelopathic, antibacterial and antioxidant potential of the essential oil from Aleppo pine (Pinus halepensis Miller) needles	2021	10.1080/03235408.2021.1991125
Xiao, W; Wang, H; Liu, W; Wang, X; Guo, Y; Strasser, RJ; Qiang, S; Chen, S; Hu, Z	Action of alamethicin in photosystem II probed by the fast chlorophyll fluorescence rise kinetics and the JIP-test	2020	10.32615/ps.2019.172
Xu, ZL; Shi, MY; Tian, YQ; Zhao, PF; Niu, YF; Liao, MD	Dirhamnolipid Produced by the Pathogenic Fungus Colletotrichum gloeosporioides BWH-1 and Its Herbicidal Activity	2019	10.3390/molecules24162969
Xuan, TD; Elzaawely, AA; Deba, F; Fukuta, M; Tawata, S	Mimosine in Leucaena as a potent bio-herbicide	2006	10.1051/agro:2006001
Yang, HN; Tang, Y; Wang, LF; Guo, YN; Luo, DF; Wu, LM; Deng, XL; Li, XG; Bai, LY	The potential of Myosoton aquaticum extracts and compounds to control barnyardgrass (Echinochloa crus-galli)	2021	10.1111/wre.12482
Yang, Q; Guo, YJ; Wang, H; Luo, Z; Chen, Y; Jiang, MY; Lu, H; Valverde, BE; Qiang, S; Strasser, RJ; Chen, SG	Action of the fungal compound citrinin, a bioherbicide candidate, on photosystem II	2024	10.1002/ps.7513
Yogendra, ND; Prakhyath, KM; Keerthi, PE; Ravikumara, R; Priyankush, C; Pragadheesh, VS	Bioherbicidal Efficacy of Essential Oils of Medicinal and Aromatic Plants in Managing Cyperus rotundus-A Noxious Weed	2025	10.1007/s10343-025-01140-w

## Sheet: Table S2List of final retained 
List of final retained studies after screening the review of bioherbicide physiological action.
Authors	Title	Year	DOI
Alvarez-Rodríguez, S; Spinozzi, E; Sánchez-Moreiras, AM; López-González, D; Ferrati, M; Lucchini, G; Maggi, F; Petrelli, R; Araniti, F	Investigating the phytotoxic potential of Carlina acaulis essential oil against the weed Bidens pilosa through a physiological and metabolomic approach	2023	10.1016/j.indcrop.2023.117149
Anwar, S; Naseem, S; Ali, Z	Biochemical analysis, photosynthetic gene (psbA) down-regulation, and in silico receptor prediction in weeds in response to exogenous application of phenolic acids and their analogs	2023	10.1371/journal.pone.0277146
Bajsa-Hirschel, J; Pan, ZQ; Pandey, P; Asolkar, RN; Chittiboyina, AG; Boddy, L; Machingura, MC; Duke, SO	Spliceostatin C, a component of a microbial bioherbicide, is a potent phytotoxin that inhibits the spliceosome	2023	10.3389/fpls.2022.1019938
Barickman, TC; Cantrell, CL; Reichley, A	A Water-Soluble β-Triketone Enriched Extract of Manuka Oil Has Increased Weed Control Efficacy Compared to Vinegar and D-Limonene in a Field and Greenhouse Evaluation	2024	10.1021/acsagscitech.4c00225
Chaimovitsh D., Shachter A., Abu-Abied M., Rubin B., Sadot E., Dudai N.	Herbicidal Activity of Monoterpenes Is Associated with Disruption of Microtubule Functionality and Membrane Integrity	2017	10.1614/WS-D-16-00044.1
Dayan, F. E., Owens, D. K., Watson, S. B., Asolkar, R. N., & Boddy, L. G.	Sarmentine, a natural herbicide from Piper species with multiple herbicide mechanisms of action	2015	doi: 10.3389/fpls.2015.00222
Guo, YJ; Liu, WZ; Wang, H; Wang, XX; Qang, S; Kalaji, HM; Strasser, RJ; Chen, SG	Action Mode of the Mycotoxin Patulin as a Novel Natural Photosystem II Inhibitor	2021	10.1021/acs.jafc.1c01811
Hubbard, M; Hynes, RK; Bailey, KL	Impact of macrocidins, produced by Phoma macrostoma, on carotenoid profiles of plants	2015	10.1016/j.biocontrol.2015.04.017
Jiang S.-J., Qiang S., Zhu Y.-Z., Dong Y.-F.	Isolation and phytotoxicity of a metabolite from Curvularia eragrostidis and characterisation of its modes of action	2008	10.1111/j.1744-7348.2007.00202.x
Li, JX; Chen, H; Guo, CW; Chen, QH; Zhao, TT; Chen, XN; Du, YL; Du, HZ; Miao, YH; Liu, DH	Artemisia argyi essential oil exerts herbicidal activity by inhibiting photosynthesis and causing oxidative damage	2023	10.1016/j.indcrop.2023.116258
López-González, D; Usero, MM; Hermida-Ramón, JM; Alvarez-Rodríguez, S; Araniti, F; Teijeira, M; Verdeguer, M; Sánchez-Moreiras, AM	Pelargonic acid's interaction with the auxin transporter PIN1: A potential mechanism behind its phytotoxic effects on plant metabolism	2024	10.1016/j.plantsci.2024.112278
Moura, MS; Lacerda, JWF; Siqueira, KA; Bellete, BS; Sousa, PT; Dall'Oglio, EL; Soares, MA; Vieira, LCC; Sampaio, OM	Endophytic fungal extracts: evaluation as photosynthesis and weed growth inhibitors	2020	10.1080/03601234.2020.1721981
Pouresmaeil, M; Nojadeh, MS; Movafeghi, A; Maggi, F	Exploring the bio-control efficacy of Artemisia fragrans essential oil on the perennial weed Convolvulus arvensis: Inhibitory effects on the photosynthetic machinery and induction of oxidative stress	2020	10.1016/j.indcrop.2020.112785
Radhakrishnan, R; Park, JM; Lee, IJ	Enterobacter sp I-3, a bio-herbicide inhibits gibberellins biosynthetic pathway and regulates abscisic acid and amino acids synthesis to control plant growth	2016	10.1016/j.micres.2016.10.004
Tong, Y; Liu, SY; Yi, SC; Qiu, ZX; Wang, YH; Zeng, DQ; Tang, WW	Bruceine D, the main active ingredient of Brucea javanica (L.) residue inhibits the germination of Bidens pilosa L. seeds by suppressing phenylpropanoid biosynthesis	2021	10.1016/j.indcrop.2021.114079
Xiao, W; Wang, H; Liu, W; Wang, X; Guo, Y; Strasser, RJ; Qiang, S; Chen, S; Hu, Z	Action of alamethicin in photosystem II probed by the fast chlorophyll fluorescence rise kinetics and the JIP-test	2020	10.32615/ps.2019.172
Yang, Q; Guo, YJ; Wang, H; Luo, Z; Chen, Y; Jiang, MY; Lu, H; Valverde, BE; Qiang, S; Strasser, RJ; Chen, SG	Action of the fungal compound citrinin, a bioherbicide candidate, on photosystem II	2024	10.1002/ps.7513
